# Supplementary material for: A new azide staining reagent based on “click chemistry”
Source: Royal Society of Chemistry journal article supplement (doi:10.1039/b706719b), 2007-01-01
Supplement: b706719b.pdf [file b706719b.pdf]

## Supplementary Information

**A new azide staining reagent was prepared and its ability to stain several agents on TLC plates was determined.**

**Tina Schröder,<sup>a</sup> Michael Gartner,<sup>a,b</sup> Tobias Grab<sup>a</sup> and Stefan Bräse\*<sup>a</sup>**

<sup>a</sup> *Universität Karlsruhe (TH), Institut für Organische Chemie, Fritz-Haber-Weg 6, 76131 Karlsruhe, Germany.  
Fax: (+)49 (0)721 608 8581; Tel: (+)49 (0)721 608 2902; E-mail: braese@ioc.uka.de*

<sup>b</sup> *Forschungszentrum Karlsruhe, Institut für Toxikologie und Genetik, Hermann-von-Helmholtz-Platz 1, 76344 Eggenstein-Leopoldshafen, Germany.*

TLC-staining of azides (Fig.1) and differentiation of amine staining versus azide staining (Fig.2) is presented.

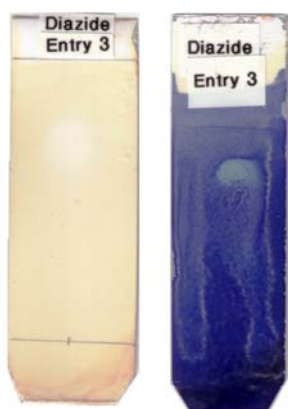

**Fig. 1** TLC analysis of 1,6-diazidohexane (Table 1, Entry 3), eluted with ethyl acetate/cyclohexane (1/5). For staining the TLC plate was shortly dried with a heatgun and afterwards dipped into a solution of 50 % propargylic alcohol in ethanol that contains a small amount (tip of a spatula) of Cu(I)-Br. After heating the plate, a white spot occurs on a slight yellow background (left TLC plate). To intensify the staining, the plate can afterwards be dipped into "Seebach staining solution" and then be heated with a heatgun (right TLC plate).

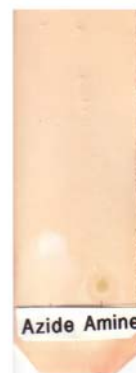

**Fig. 2** TLC analysis of a diazide (Table 1, Entry 10), eluted with ethyl acetate/cyclohexane (1/5) and an amine (1,8-diaminooctane). The TLC plate was developed with the "click-staining-reagent". It shows the different staining of azides (left spot) and amines (right spot) which allows their differentiation.
